# Supplementary material for: Leveraging vibration of effects analysis for robust discovery in observational biomedical data science
Source: PLoS Biol. 2021 Sep 23;19(9):e3001398. doi: 10.1371/journal.pbio.3001398 (PMC8510627; doi:10.1371/journal.pbio.3001398)
Supplement: S1 Table — (XLSX) [file pbio.3001398.s001.xlsx]

## Sheet: Sheet1
TERM	DEFINITION
Vibration of effects	How model output changes as a function of specification, specifically the distribution of the size, direction, and statistical significance of the association between two features
Janus effect	Situations where, for a single association of interest, model specification yields contradicting results, reporting both positive and negative output
Confounding variables	Variables that, when one is associating an "X" to a "Y" are correlated to both X and Y.
Adjusting variable	A variable included in a model to account for its potential confounding affect on an association.
Model specification	The set of adjusters included in a specific model.
Multiverse analysis	Any type of analysis that considers how variation in data preparation or analysis can change results. Modeling vibration of effects is one example of multiverse analysis.
